# Supplementary material for: Shape-dependent optoelectrical investigation of Cu2+xCd1−xSnS4thin films for solar cell applications
Source: Royal Society of Chemistry journal article supplement (doi:10.1039/c5nj03154k), 2016-01-01
Supplement: c5nj03154k1.pdf [file c5nj03154k1.pdf]

## Shape dependent optoelectrical investigation of $\text{Cu}_{2+x}\text{Cd}_{1-x}\text{SnS}_4$ thin films for solar cell applications

Johnson Henry, Pasunkili Prema,<sup>a</sup> Duraipandi Pathinettam Padiyan,<sup>a</sup>

Kannusamy Mohanraj, <sup>\*,a</sup> and Ganesan Sivakumar <sup>b</sup>

<sup>1</sup> Department of Physics, Manonmaniam Sundaranar University, Tirunelveli-627 012,  
Tamilnadu, India

<sup>2</sup> CISL, Department of Physics, Annamalai University, Annamalai nagar-608 002. Tamilnadu,  
India

\* Corresponding author: e-mail [kmohanraj.msu@gmail.com](mailto:kmohanraj.msu@gmail.com); [mohanraj@msuniv.ac.in](mailto:mohanraj@msuniv.ac.in)

Phone: +91-9788083079

### Supplementary Information

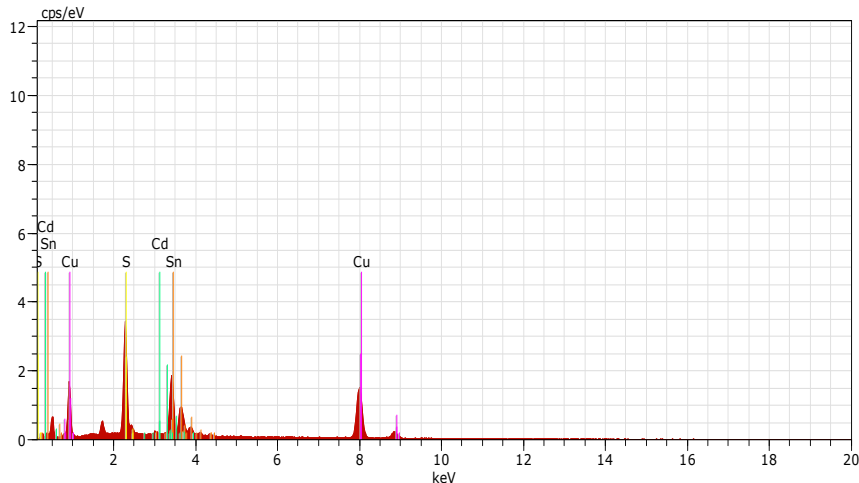

Fig S1. EDX analysis of CCTS-2

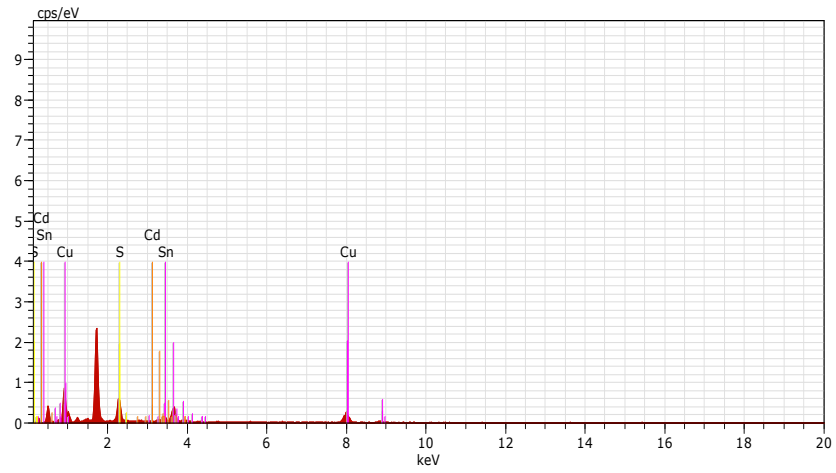

Fig S2. EDX analysis of CCTS-5

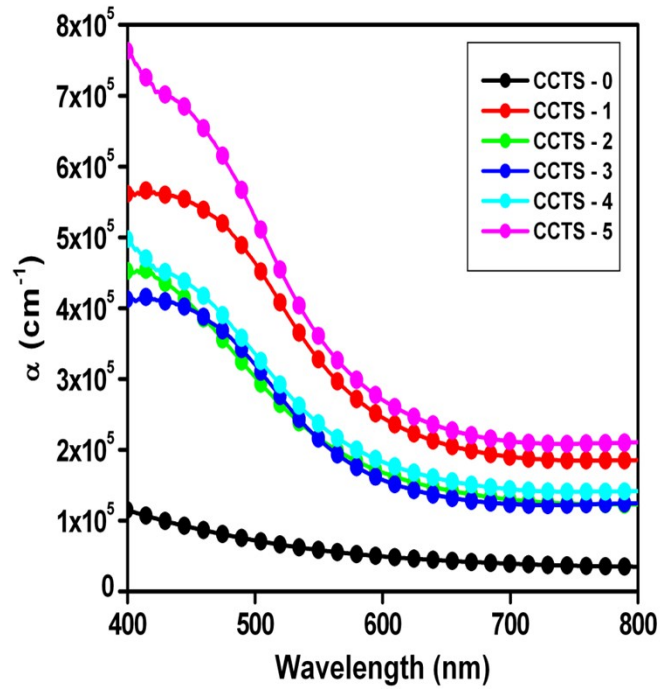

Fig.S3. Absorption coefficient spectra of  $\text{Cu}_{2+x}\text{Cd}_{1-x}\text{SnS}_4$  films.
